# Supplementary material for: A cluster of noncoding RNAs activates the ESR1 locus during breast cancer adaptation
Source: PubMed Central journal article supplement (PMC4421845; doi:10.1038/ncomms7966), 2015-04-29
Supplement: ncomms7966-s1.pdf [file ncomms7966-s1.pdf]

## **Supplementary Information**

### **A cluster of non-coding RNAs activates the *ESR1* locus during breast cancer adaptation**

Saori Tomita, Mohamed Osama Ali Abdalla, Saori Fujiwara, Haruka Matsumori,  
Kazumitsu Maehara, Yasuyuki Ohkawa, Hirotaka Iwase, Noriko Saitoh, and Mitsuyoshi  
Nakao

#### **Supplementary Information contains:**

Supplementary Figures 1-9

Supplementary Tables 1-6

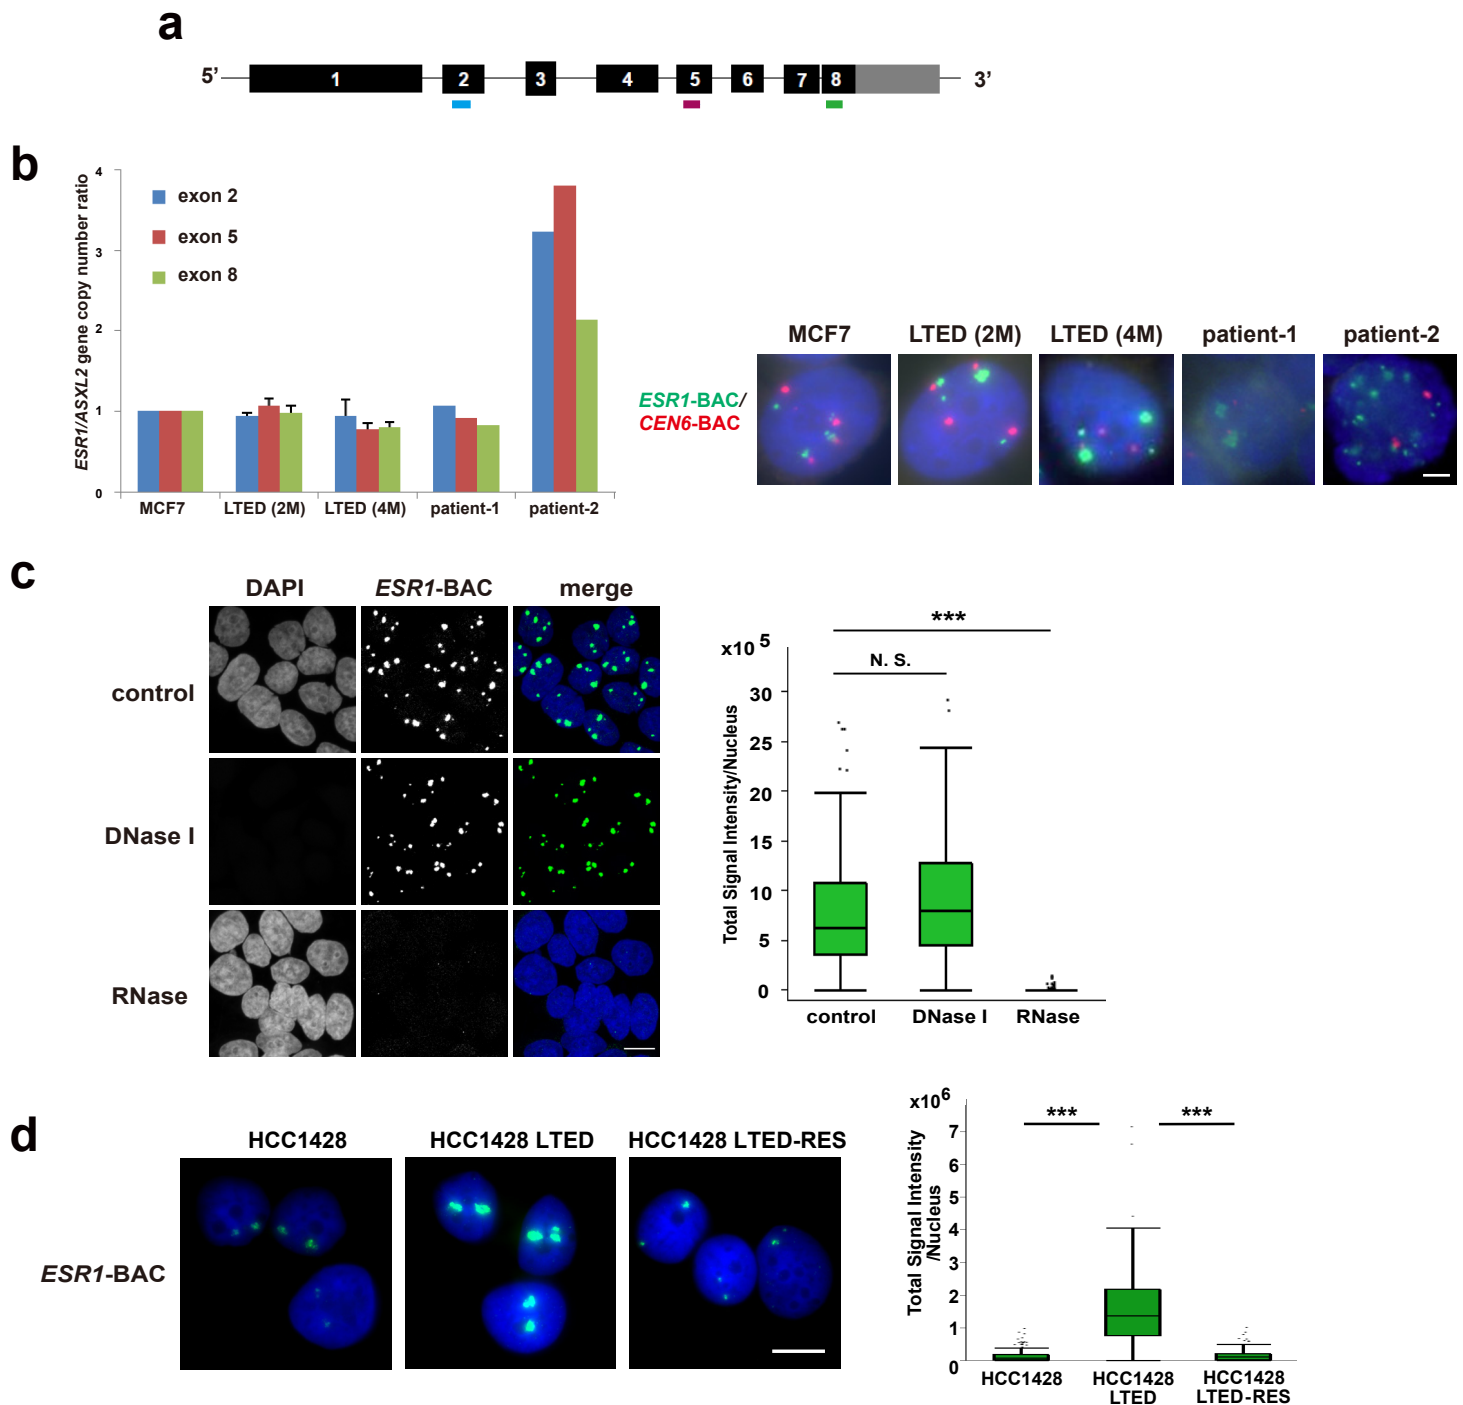

### Supplementary Figure 1. Enlarged FISH signals are mainly composed of RNAs

(a) Schematic diagram of the *ESR1* gene. Black boxes with numbers represent exons. Positions for primers used in (b) are denoted with colored bars at the bottom. (b) Copy number variation analysis. Relative copy numbers of the *ESR1* gene were measured by genomic qPCR (left). Values for MCF7 cells were set to 1. Each value was normalized to the *ASXL2* gene. Corresponding FISH images (right). Relative copy numbers were constant in MCF7 and LTED cells, and patient-1 samples, suggesting that *ESR1* gene amplifications did not occur in LTED cells. In contrast, patient-2 samples showed significant *ESR1* amplification (>2.0) that corresponded to numerous scattered FISH signals. Bar, 10  $\mu$ m. (c) FISH signals were enriched with RNAs. The enlarged FISH signals were detected in LTED cells using the *ESR1*-BAC probe (green, control). The signals were not affected by DNase treatment (DNase I), but showed a marked decrease in size by RNase treatment (RNase A). DNA was stained with DAPI. Genomic DNA was completely digested by the DNase. The residual FISH signals after RNase treatment represented *ESR1* locus DNA. Thus, the FISH signals were mainly composed of RNAs transcribed from the *ESR1* locus. Right panel shows quantification of the FISH signals. (d) RNA-FISH of breast adenocarcinoma cell line HCC1428, probed with *ESR1*-BAC. Eleanor FISH signals were enlarged with estrogen deprivation for 1 month (HCC1428 LTED), and suppressed with 100  $\mu$ M resveratrol for 24 h (HCC1428 LTED-RES). Right panel shows quantification of the FISH signals. In (c) and (d): bar 10  $\mu$ m, n > 150 nuclei/sample, P-values were calculated using Student's *t*-test (\*\*\*)p<0.0001, N. S., not significant).

**a**

| Gene          | Expression value in MCF7 mRNA-Seq (RPKM) | Expression value in LTED mRNA-Seq (RPKM) | Fold Change (LTED / MCF7) | Chromosome position |
|---------------|------------------------------------------|------------------------------------------|---------------------------|---------------------|
| <i>ESR1</i>   | 52.21811                                 | 102.8718                                 | 1.97004                   | 6                   |
| <i>ERBB2</i>  | 18.60553                                 | 37.56174                                 | 2.018848                  | 17                  |
| <i>APP</i>    | 71.97262                                 | 114.2807                                 | 1.587836                  | 21                  |
| <i>ERGIC1</i> | 60.11627                                 | 119.1596                                 | 1.982153                  | 5                   |

**b**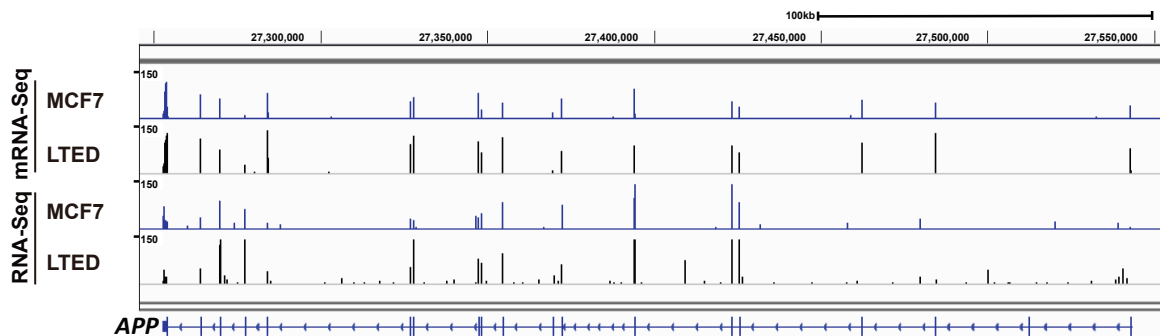**c**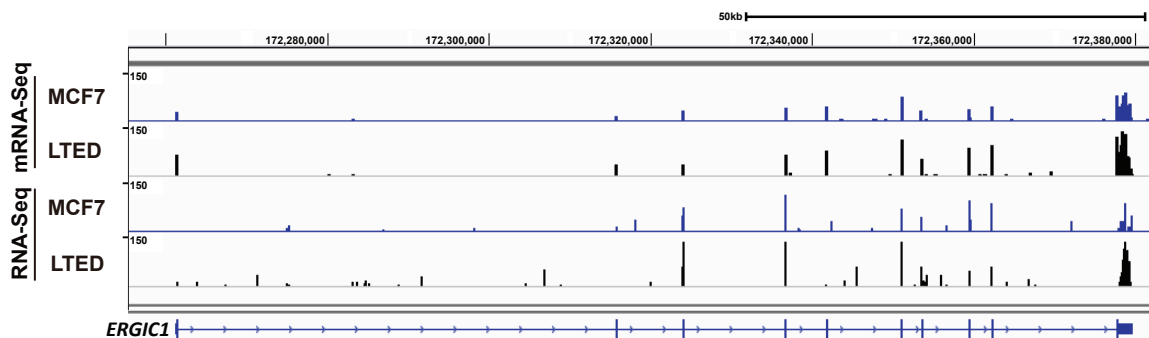**d**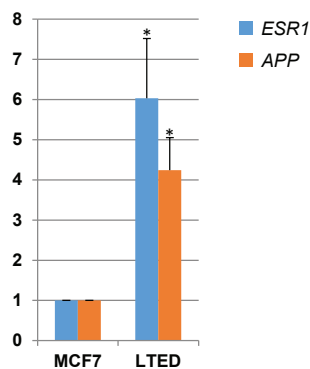

**Supplementary Figure 2. Genes that are up-regulated without ncRNA transcription in LTED cells**  
**(a)** Genes that were up-regulated in LTED; *APP* (amyloid beta (A4) precursor protein), *ERBB2*, *ERGIC1* (endoplasmic reticulum-golgi intermediate compartment) and *ESR1*. Each expression value derived from the mRNA-Seq is shown. All of the four genes showed the similar level of fold change (approximately 2.0) in LTED relative to MCF7 cells. **(b and c)** Gene tracks representing mRNA-Seq and RNA-Seq of the *APP* (b) and *ERGIC1* (c) loci. Unlike the *ESR1* locus shown in Fig. 1e, there was no induction of ncRNAs in these loci in LTED cells. **(d)** qRT-PCR experiment shows comparable induction levels of *ESR1* and *APP* mRNAs in LTED cells. Values in MCF7 were set to 1. Values are the means  $\pm$  SD; n = 3. P-values were calculated using Student's *t*-test (\* $p < 0.05$ ).

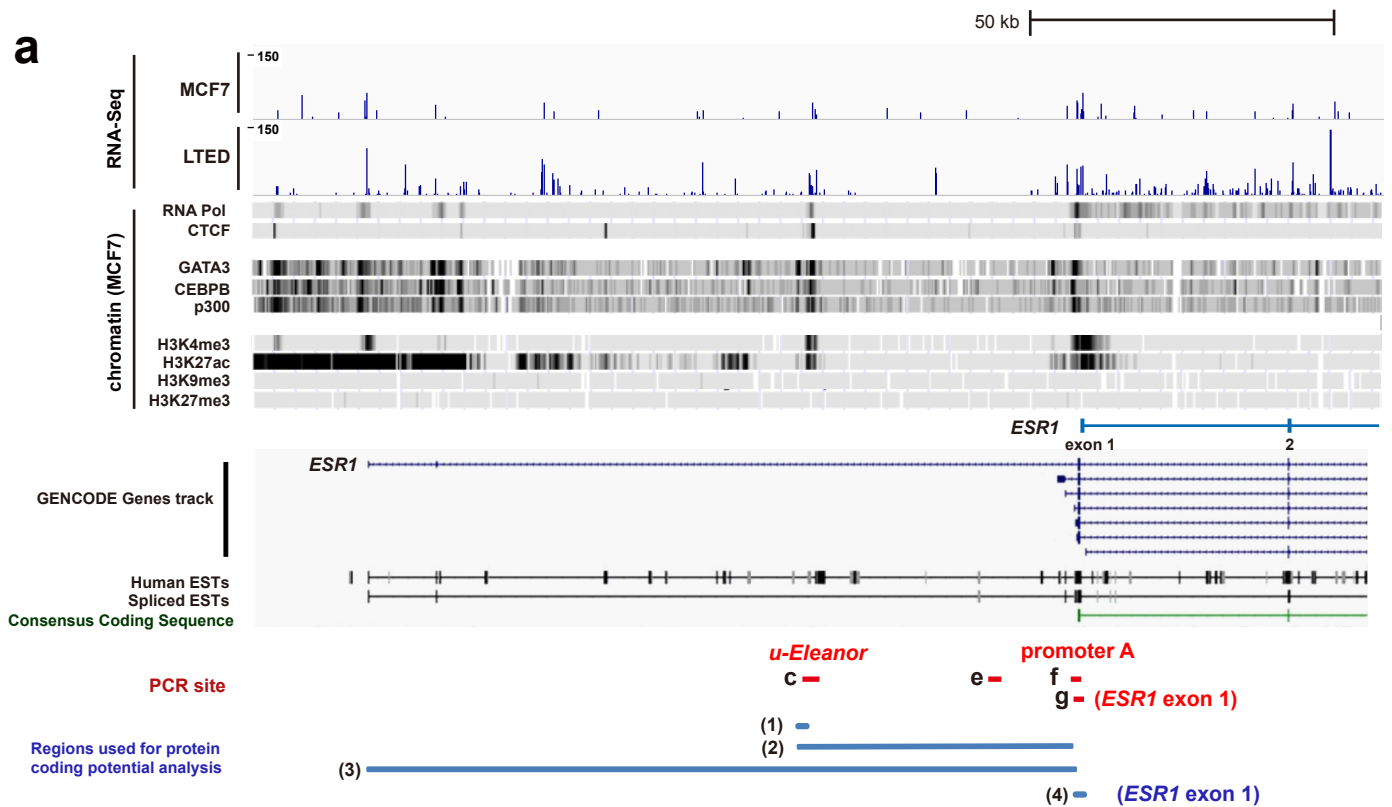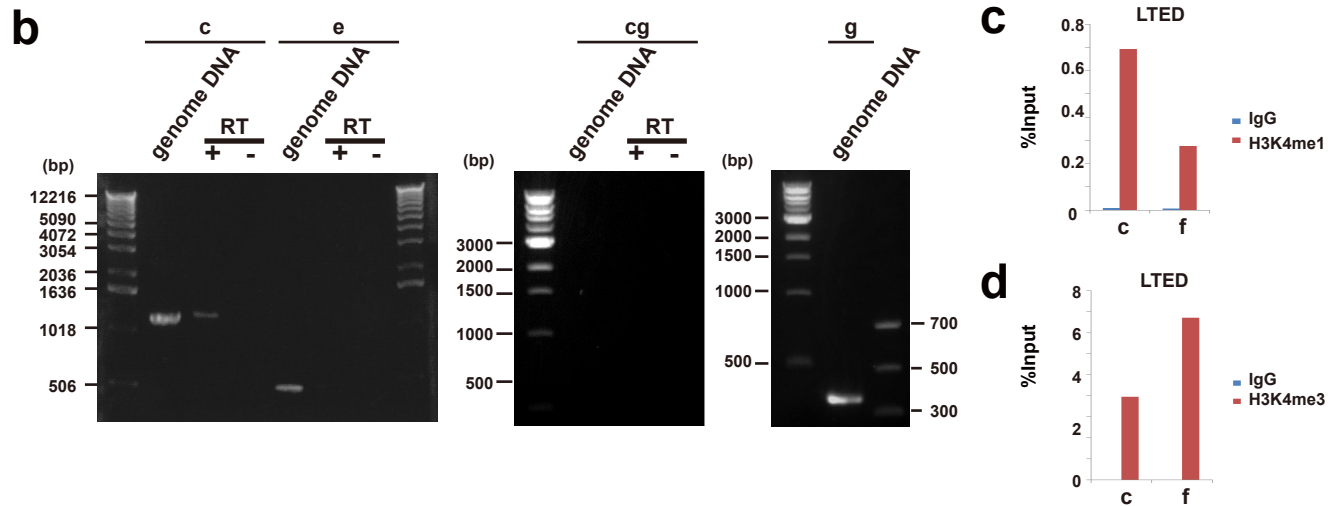

**Supplementary Figure 3. *u-Eleanor* is transcribed from a region upstream of the *ESR1* gene**

(a) Overview of a region upstream of the *ESR1* locus. The RNA-Seq tracks were aligned with the ChIP-Seq data available in the UCSC genome browser (**Supplementary Table 1**), gene annotation from GENCODE version 19, human expressed sequence tags (ESTs) localization in GenBank, gene annotation from the Consensus Coding Sequence project. Sites for PCR experiments in **Supplementary Fig. 3b, c and d** (c, e, f and g), and regions used for prediction of protein coding potential by CPAT program (<http://lilab.research.bcm.edu/cpat/>) in **Supplementary Table 5** ((1) ~ (4)) are shown. Regions g and (4) correspond to *ESR1* exon 1. (b) Expression of *u-Eleanor* from site c in LTED cells. In agreement with the results in **Fig. 4b**, RT-PCR experiments detected transcription at site c, but not site e. A transcript of ~1200 nucleotides corresponded to a part of *u-Eleanor*. A transcript that links *u-Eleanor* and promoter A (cg) was not detected, excluding the possibility that *u-Eleanor* is an alternative promoter. Genomic DNA was successfully amplified with the same primers in site g (g), confirming the feasibility of the primers. Total RNA was treated with DNase prior to reverse transcription (+RT). (c and d) ChIP-qPCR analyses of H3K4me1 (c) and H3K4me3 (d). The levels of modified histone H3 were measured in the *u-Eleanor* gene region (site c) and *ESR1* promoter A (site f). The *u-Eleanor* region was marked with H3K4me1 rather than H3K4me3.

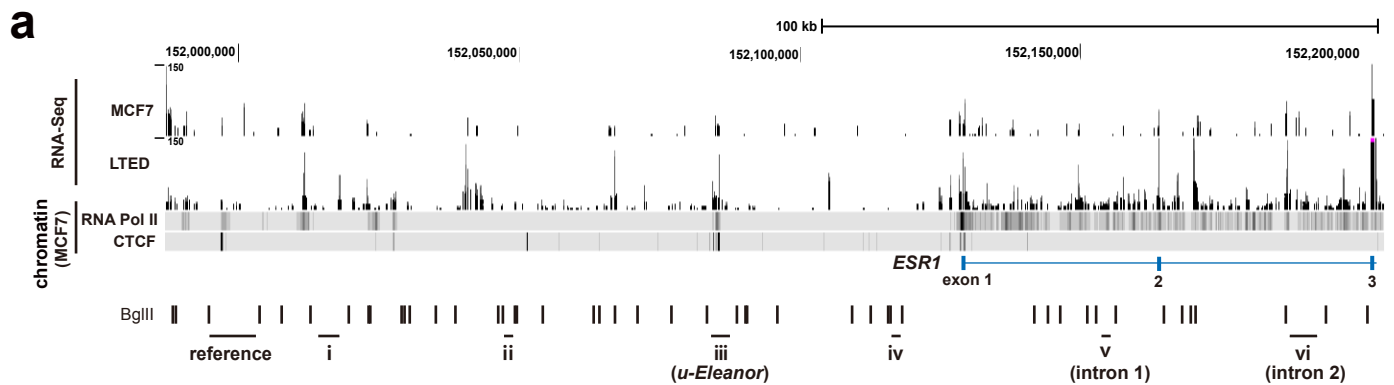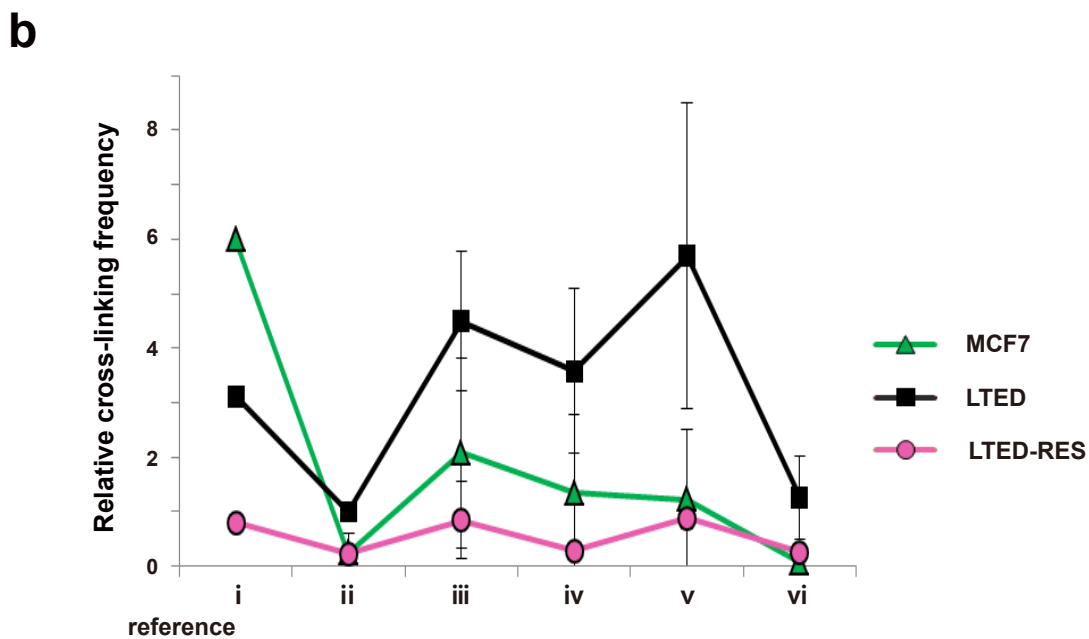

**Supplementary Figure 4. Chromatin conformation changes around the *u-Eleanor* gene region during LTED adaptation**

(a) Overview of a region upstream of the *ESR1* locus. The RNA-Seq tracks were aligned with the ChIP-Seq data available in the UCSC genome browser (**Supplementary Table 1**). Positions of BglII sites and the analyzed fragments (reference and i–vi) are shown at the bottom. (b) Relative chromosomal interactions between the reference and distal sites (i–vi) were measured by chromosome conformation capture (3C)-qPCR. The interaction frequency between the reference and site ii in LTED cells was set to 1. Each value was normalized to qPCR values obtained with BAC templates. To compare MCF7, LTED and LTED-RES cells, the values obtained with the internal control primers (*ESR1* intron 3) were used as a DNA loading control. Values are the means  $\pm$  SD; n = 3.

(-45218)

GTCACCTTTAAGGGGCTCTTTAAATCCCAGCTCTTTCATTTACAAATCTATGACCTTGGATGAGTTTTTCACTTTT  
CTGTGCCACAAGTTCTCAGTAAAATGGAGATAATTATAGAACTTACTTCATAGAGCTTTGAGAATCATA CAGGTAAG  
TTATTTTACGTAATTAGCACTCAAAGTGACCATTAATAATCTAACGTTTTAAAATATATTAATAGGCCAGATGCAGT  
GGCTCACACCTGTAATTT CAGCACTTTGGGAGGCTGAAGTGGGTGGATCACTTGAGGTCA GGGGTTCAAAGCCAGCCT  
GGCCAACATGGCGAAACTCCGTCCCTACTAAAATGTA AAAATTAGCTGGGCATAGTGGCGTGTGTCTGTAGTCCCAG  
CTATTCAGGAGGCTGAGGCAGGAAAATCGCAGTGAGCCGAGATCACGCCACTGCACCTCTAGCCTGGGTGACAGAGTGG  
GACTCCATCTCAAAAACAACAACAACA AAAATTAATAGTTTAAATATTTTAAATATATTTCAATATATAAAGATG  
TAATTTTTATTTTAAATATAT TAAAATAGATAAGTTTAAAATACATAAAGTAAATATATAAAAATTAATATGTTAAAAT  
GTTTACTGAAAGTTTACATTTTCTCTGTATTGCTAAGAGCAATTTATG CCTTATATGTTGTGTAATATCTAGAAA  
CACACCTATGTAATTTCCAAAT TATAACCACCTTGGCTCCTGGACAAGTAGGACTGTGTCTGATTTTTTTTTTTCAT  
CCTTGTCACTACCTGCCACTCTGAGATCACTTGTGTCTTTCCATATATAATCACCTCTAGGTACACTTCTTTCATTA  
TTTCTACGCATCCTCTCCACTTTGCTGCATTTCTGTGTGCATTTCTTTCTCCACGTTGAAAGAAATATGCATATTG  
AGCGATTCCAACCCCAAAGGCAAAAAT TACTAGCCAGTGTGAAAATGAAAGCAAGGAATTTTTTGGTTATTGTTGC  
TGTAACTTTTTGATGTGCGTACATATGTGCGTCTTTTTTTTCCCCCTAGGGGTGGAATGGGGTGGTGTAGTCAGGGA  
TTACTGACAGGACGGTGTGCCTACTGTGTGGAGAGACTAAGACTGGGGAAAGATTCCTCAAGGCTGGGAAATGCAG  
ACGTCCAGTCTTGAAAACAGTTTGTCTGGTGTATGTCAGAAGAGGAGTGTATTCCTGGAAGAAGGCCACAAA  
ATATACCCAGAGCCAGGTGCCTTTCTAAGACGAATCAACATTCACCTCACAAGTTCAGCTAATATATGACAGAAATAC  
AAGAATGAACAAGACTCCTGACTTAAGCTTACAGCTGATGGGAAACTTGGGAACTGGACAGAGAAT TAAAATACAACG  
TGGTTAGGTACAACCTACCTGCGCCAGA GGAGTGACGGAAGGCCTTGGACGGGGAGTGTGCCTGGAGGATGACAGGG  
CGACAGGTAAGTTAGGGGGCTGGGAAGGGGAAGGGCGGCCCTGTGGGTAAAGGGAAGGAGGTTAAAGTCAGCAGGGAA  
ACAGGCAGTTCCTGTGTGCTGAGCAAAGCGGGGGTGTGGCTCTCCTGTCTCTGGCTTTGCTGTCAACAGCGGAGA  
TTGGCAAGTAGGGCGACCAACCGCCTGGTTTGTCTGGGACCGGGGTTTCTGGAAGGTGGGACTTCAATGCTAAAA  
CTGGGACAGTCTGGGCAAACA AATCAGTACGGTTGGCCACCCCTATCTTGTGTGGGCATCTGCTAACTGAGTCATGG  
GCCTGTCTGGTTTATTTATTTATTTTTTTTTCTGCCTGAGTAACAGAAGAATGTGTTAAACATATGGAGTATGGAAGAA  
GAAGGAGAGGGGAGATAGGATTTTTATGTTATAGATTGGAAGAAGACATCCTTGATGAAGGAGATGTTTTTACTTTGG  
AGAAGGACTGCCTCAGCCGCGAAAGACCAAGGGGTGGCACCACAGGGAGAAGTCTGCACTGCGCTTGT CAGGACGGCC  
AGTGGGGGGCTGCTGAGCGCAGGGAGTCACTCCTCGCAATGAAGATATAGTCTCGGGGAGATAATGCTGGAATCGAT  
GGAAGAAGTGAACAGGACACAAATTTAGTGAATTTCTTTACAATGTGTGCTTCTTGT CACCAGTTCGTTAACCATG  
ATAAAAACGGTTATGTTGTTACATTCATCAAGATCCAAATTTTCTACCATTTTAAGATGTCTATCAGTCACAATGATG  
ATCACTGAAGACCGAACGAGATCATTTCTCTAAAATTTATGTTACATTTATCCATAATGGCATCAGTGTCTGTTACA  
CGTTTGCTTTAATTTTGAGGTCAAATACGACATTTGTA AATCTAGCACTTCATGTGATCTGTGAAGCACTAAACAGCT  
AAACATATTTACTTCTTTTTTTTGAATCAATTAGAACAGTGCTGTACAATAGAAAATAGAACAGTGTGTACAATGG  
AAACAGTGTGTACAACAGAAATCTGT CAGCCACACGTGTCTGTTAACTTTTCTAGTAATCACATTA AAAATGTA  
AAGAAGCCAATAAAAAGTAATTTTAA (-42619)

**Supplementary Figure 5. Putative estrogen-response elements are present in the *u-Eleanor* gene region**  
DNA sequence around the *u-Eleanor* region. Sites #1 (red) and #2 (green) in the *u-Eleanor* region were analyzed in Figure 4. Putative ER binding sites (yellow) were predicted by Weblogo (<http://weblogo.berkeley.edu/>). Nucleotide numbers indicate positions from the *ESR1* transcription start site.

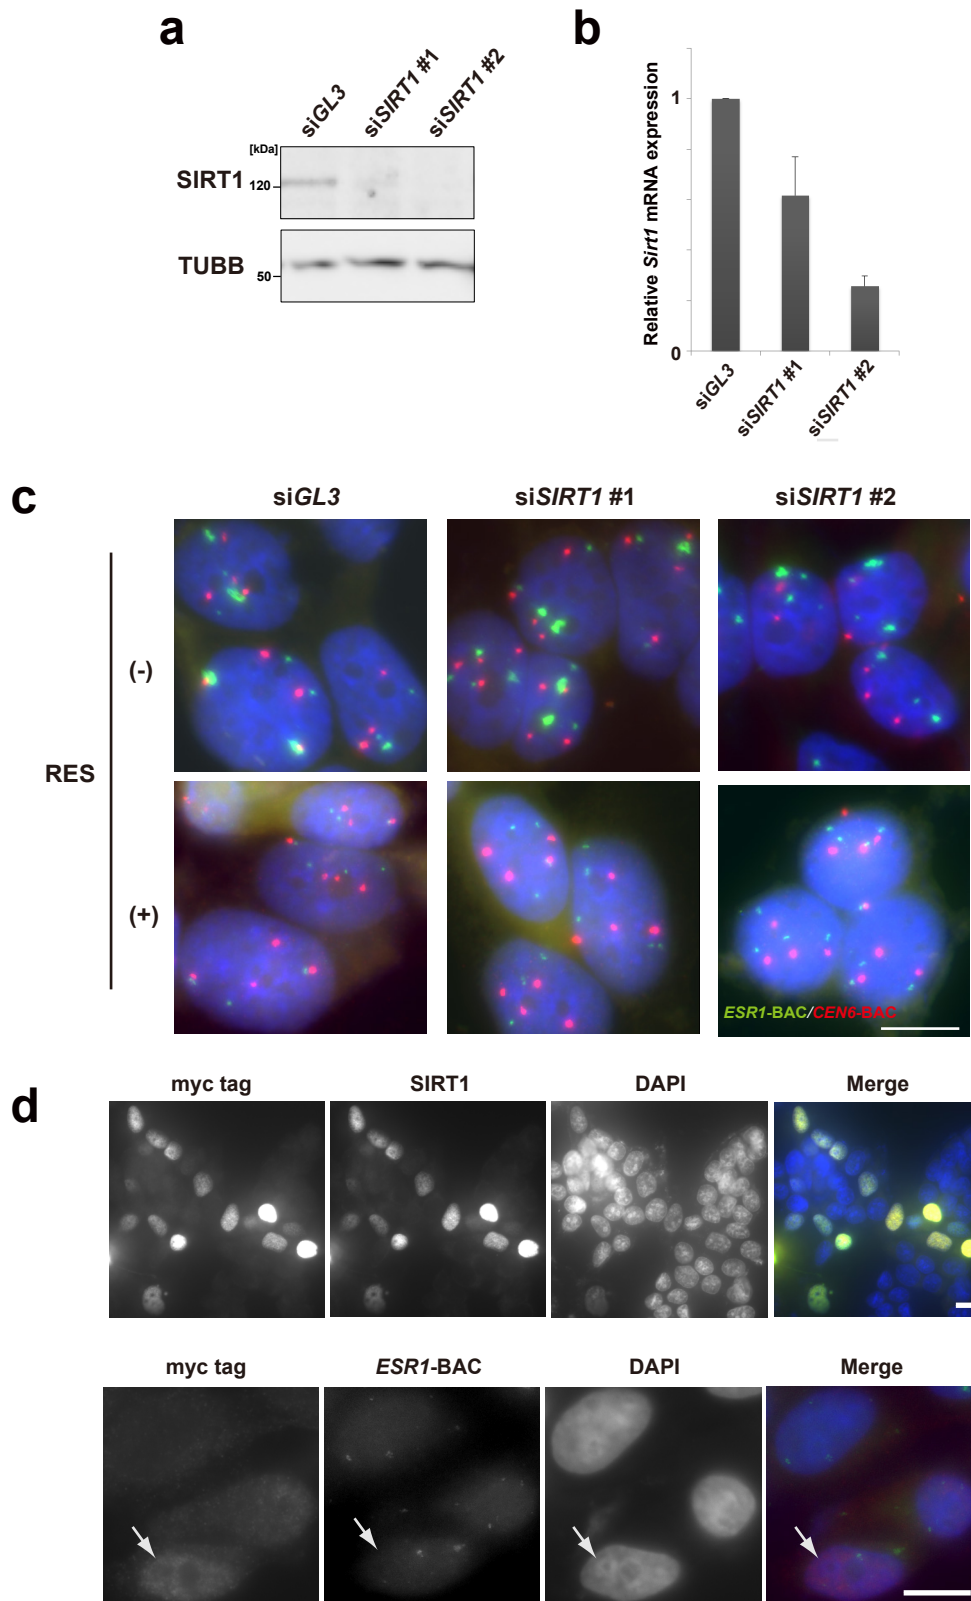

**Supplementary Figure 6. Repressive effects of resveratrol on the *ESR1* locus are independent of SIRT1**

**(a and b)** siRNA-mediated knockdown of SIRT1. Immunoblotting (a) and qRT-PCR (b) were carried out with LTED cells. Values are the means  $\pm$  SD;  $n = 3$ . **(c)** SIRT1 knockdown did not affect the suppressive effect of resveratrol on FISH signals. FISH analyses of heat-denatured samples showed *Eleanor*-containing foci (green, *ESR1*-BAC probe) and centromeric regions (red, *CEN6*-BAC probe) in LTED cells. Bar, 10  $\mu$ m. **(d)** No effect of SIRT1 overexpression on FISH signals. In the upper panels, immunofluorescence analyses of LTED cells expressing myc-tagged SIRT1 were performed using antibodies against myc-tag (red) and SIRT1 (green), together with DAPI staining (blue). In the lower panels, immuno-FISH analyses showed that SIRT1-overexpressing LTED cells (red, arrows) maintained the enlarged *Eleanor*-containing foci (green, *ESR1*-BAC probe) compared with that in adjacent control cells. Bar, 10  $\mu$ m.

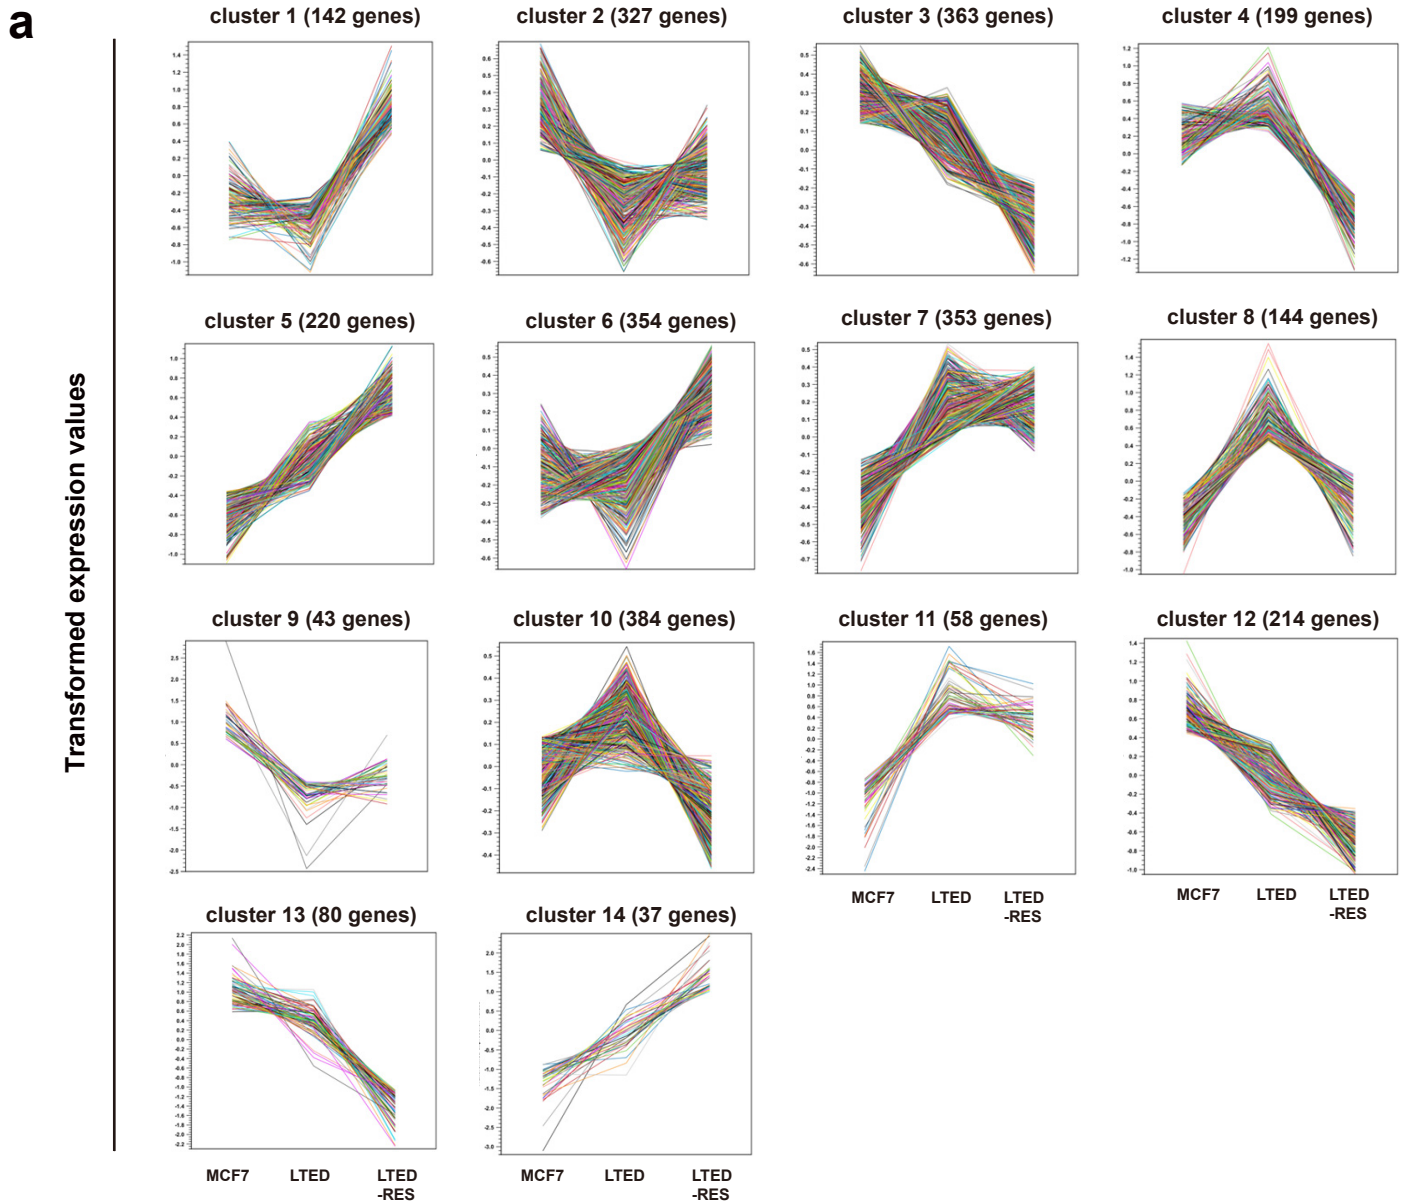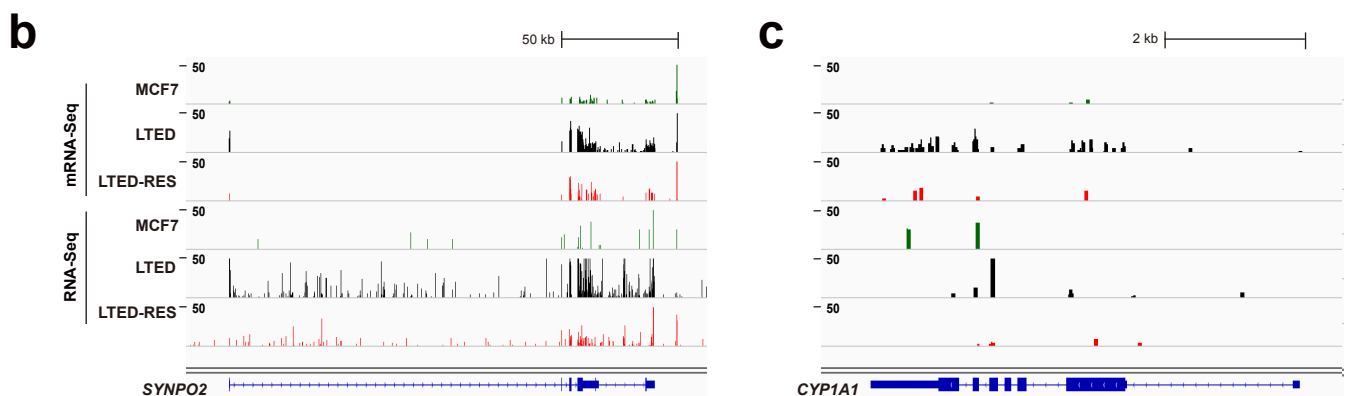

**Supplementary Figure 7. Expression patterns of genes that are differentially regulated in MCF7, LTED, and LTED-RES cells**

(a) The 2,918 genes that underwent dynamic changes in mRNA expression were classified into 14 clusters using a k-means clustering algorithm. (b and c) Representative gene loci that showed up-regulation of mRNA in LTED cells and down-regulation in LTED-RES cells. The *SYNPO2* locus showed coordinate expression of ncRNA and mRNA in LTED and LTED-RES cells (b), while the *CYP11A1* locus did not show such expression (c).



**Figure 4e**

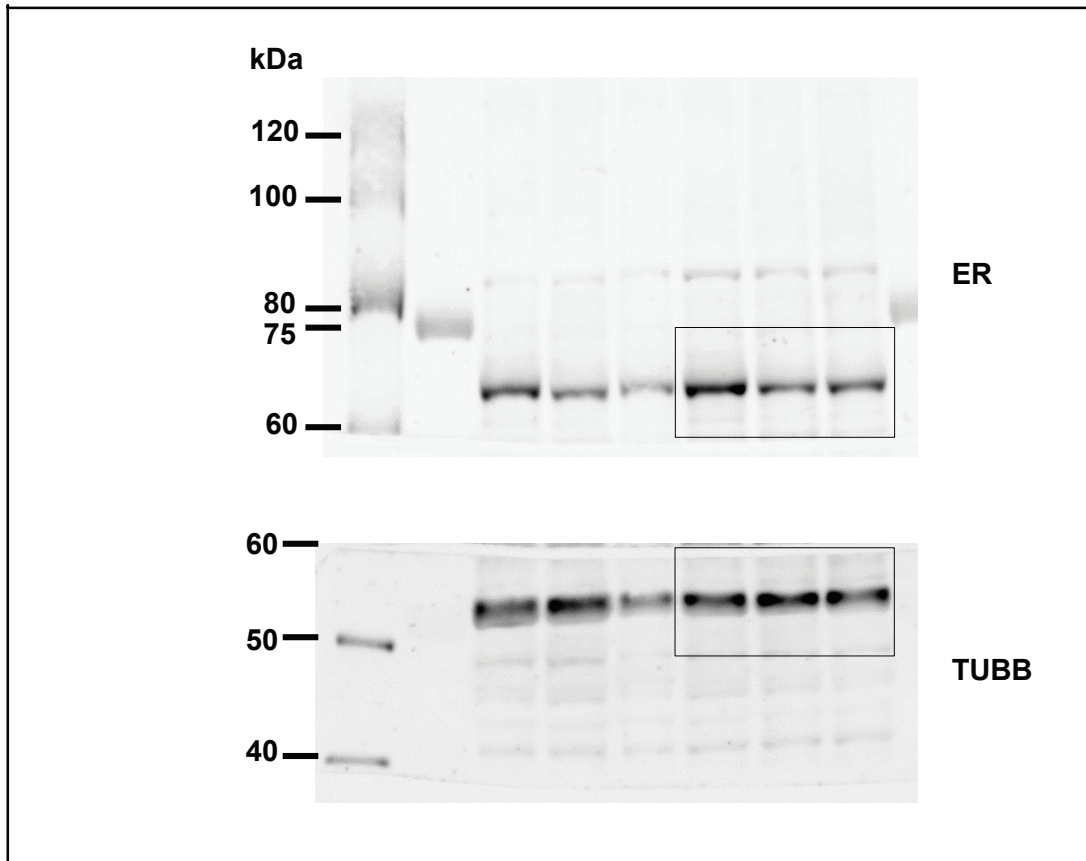

**Figure 5b**

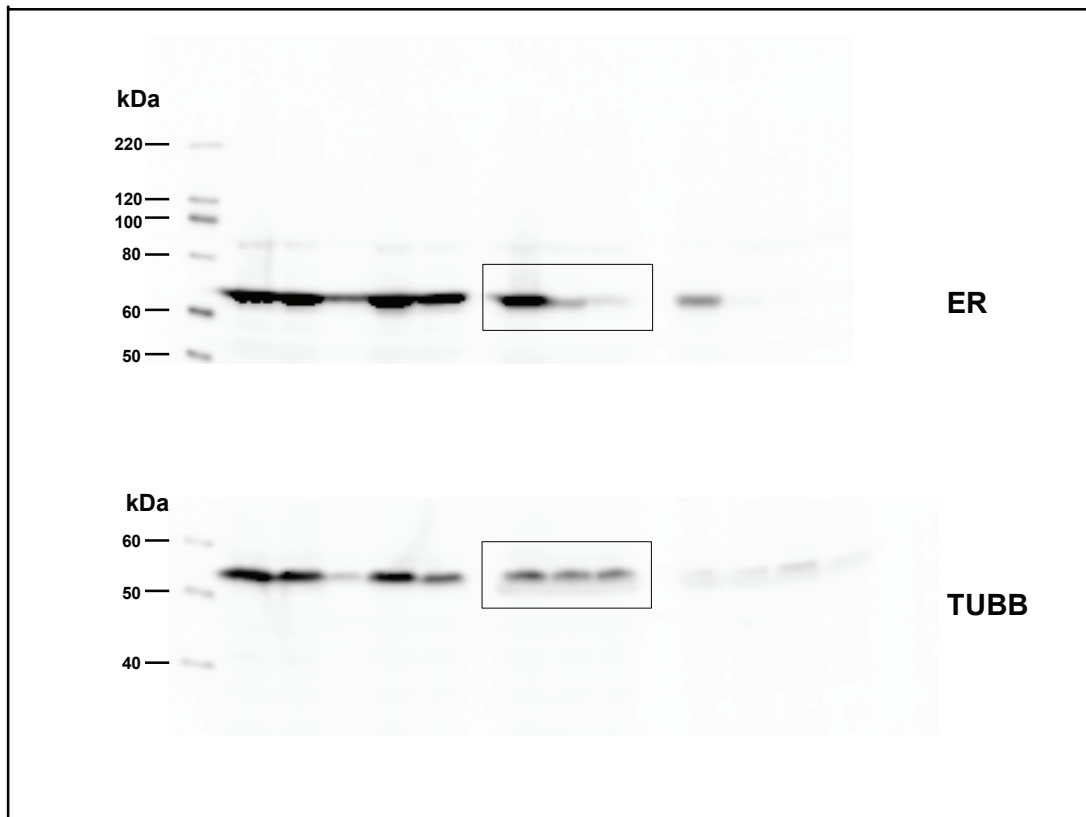

**Supplementary Figure 8. Uncropped immunoblots for Figs 4e and 5b**

Supplementary Figure 3b

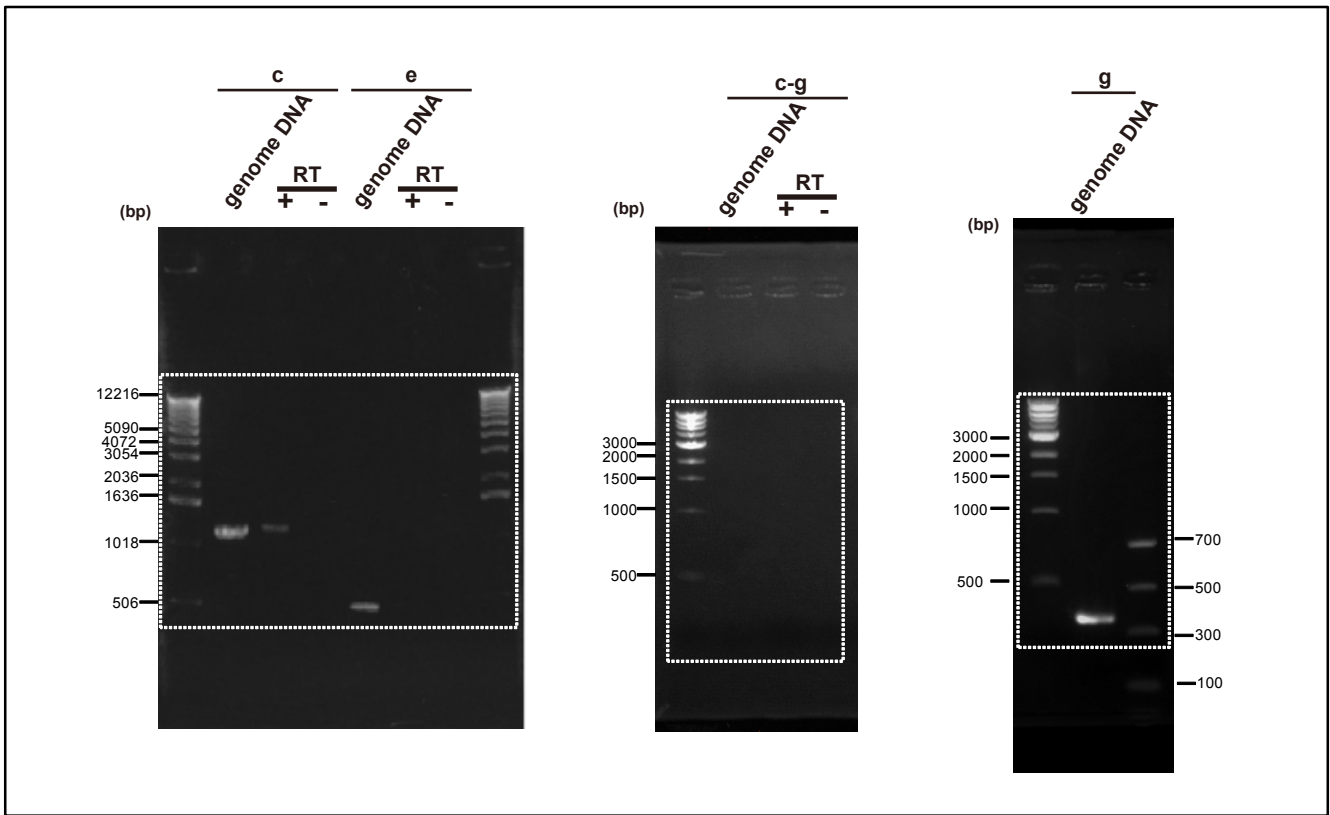

Supplementary Figure 6a

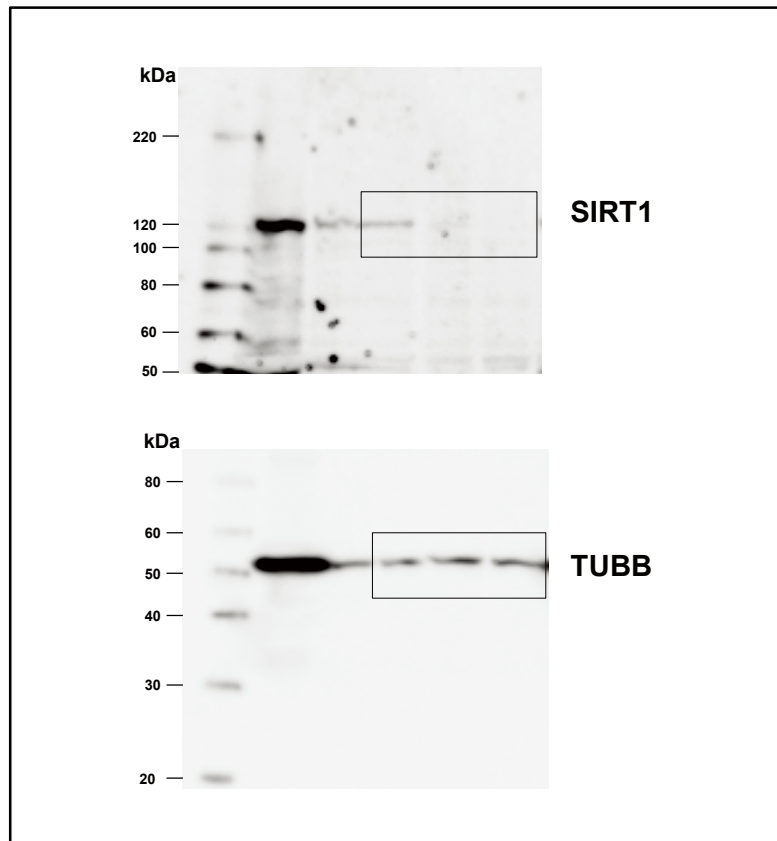

Supplementary Figure 9. Uncropped agarose gel and immunoblots for Supplementary Figs 3b and 6a

**Supplementary Table 1. ChIP-Seq data used in this study**

| <b>Data</b>                                               | <b>File Name</b>                                                                     |
|-----------------------------------------------------------|--------------------------------------------------------------------------------------|
| RNA Pol II<br>(Crawford, Iyer-UT Austin)                  | wgEncodeOpenChromChipMcf7Pol2Sig.bigWig<br>wgEncodeOpenChromChipHelas3Pol2Sig.bigWig |
| CTCF<br>(Crawford, Iyer-UT Austin)                        | wgEncodeOpenChromChipMcf7CtcfSig.bigWig                                              |
| GATA3<br>(Myers, Hudson Alpha)                            | wgEncodeHaibTfbsMcf7Gata3V0422111RawRep1.bigWig                                      |
| CEBPB<br>(Myers, Hudson Alpha)                            | wgEncodeHaibTfbsMcf7Cebpbsc150V0422111RawRep1.bigWig                                 |
| p300<br>(Myers, Hudson Alpha)                             | wgEncodeHaibTfbsMcf7P300V0422111RawRep1.bigWig                                       |
| H3K4me3<br>(Stamatoyannopoulos, UW)                       | wgEncodeUwHistoneMcf7H3k4me3StdRawRep1.bigWig                                        |
| H3K27ac<br>(Snyder, Farnham-USC)                          | wgEncodeSydhHistoneMcf7H3k27acUcdSig.bigWig                                          |
| H3K9me3<br>(Snyder, Farnham-USC)                          | wgEncodeSydhHistoneMcf7H3k09me3UcdSig.bigWig                                         |
| H3K27me3<br>(Snyder, Farnham-USC)                         | wgEncodeSydhHistoneMcf7H3k27me3bUcdSig.bigWig                                        |
| H3K36me3-MCF7<br>(Snyder, Farnham-USC)                    | wgEncodeSydhHistoneMcf7H3k36me3bUcdSig.bigWig                                        |
| H3K36me3-HeLa<br>(Bernstein, Bernstein - Broad Institute) | wgEncodeBroadHistoneHelas3H3k36me3StdSig.bigWig                                      |

**Supplementary Table 2. Mapped reads in mRNA/RNA Seq**

|             | sample                 | total      | unmapped   | mapped     | mapped(%) |
|-------------|------------------------|------------|------------|------------|-----------|
| mRNA<br>Seq | MCF7                   | 36,067,192 | 7,158,285  | 28,908,907 | 80.15%    |
|             | LTED                   | 31,122,231 | 8,857,592  | 22,264,639 | 71.54%    |
|             | LTED-RES               | 25,651,739 | 5,234,428  | 20,417,311 | 79.59%    |
| RNA Seq     | MCF7 (stranded)        | 24,740,764 | 13,047,062 | 11,693,702 | 47.27%    |
|             | LTED (stranded)        | 34,817,960 | 21,456,745 | 13,361,215 | 38.37%    |
|             | LTED-RES<br>(stranded) | 41,471,290 | 20,511,699 | 20,959,591 | 50.54%    |

### Supplementary Table 3. Primers and siRNAs

| qPCR primer             | Sequence                      |
|-------------------------|-------------------------------|
| ESR1 No.1-mRNA-S        | 5'-AGAACGAGCCCAGCGGCTAC-3'    |
| ESR1 No.1-mRNA-AS       | 5'-CCTTGCAGCCCTCACAGGAC-3'    |
| ESR1 No.2-mRNA-S        | 5'-TTACTGACCAACCTGGCAGA-3'    |
| ESR1 No.2-mRNA-AS       | 5'-ATCATGGAGGGTCAAATCCA-3'    |
| ESR1 exon 1-S           | 5'-ATGACCCTCCACACCAAAGCAT-3'  |
| ESR1 exon 1-AS          | 5'-ATCTTGAGCTGCGGACGGTT-3'    |
| ESR1 intron 2 site-a-S  | 5'-TTCAGAAGGTTGTGTGGCGTAGA-3' |
| ESR1 intron 2 site-a-AS | 5'-CAGCTTCTGTTGGCACCTTA-3'    |
| ESR1 intron 2 site-b-S  | 5'-CCATTGCTGAGTTAGCTGC-3'     |
| ESR1 intron 2 site-b-AS | 5'-AAACGGCTTAGATGAAGGAG-3'    |
| ESR1 intron 2 site-c-S  | 5'-GTTTCACTGTGTTGGGCACACTA-3' |
| ESR1 intron 2 site-c-AS | 5'-ATTTTAAAACGAGCCAGGCA-3'    |
| ESR1 intron 2 site-d-S  | 5'-TAGTAGAGGCTGTTCCCTTC-3'    |
| ESR1 intron 2 site-d-AS | 5'-CTGTAACCTTACCCATAGCC-3'    |
| ESR1 intron 2 site-e-S  | 5'-TCATGAGCAATGCGTGGCTT-3'    |
| ESR1 intron 2 site-e-AS | 5'-CAAGGCTTGGTTCTAAGCAG-3'    |
| ERBB2 intron 11-S       | 5'-CATATGGGGAGCACTGTCTG-3'    |
| ERBB2 intron 11-AS      | 5'-TTACTGCCACCTGCTCCACA-3'    |
| ESR1 5'UTR-a-S          | 5'-AAGAATGTCTGATGGTGCCCTG-3'  |
| ESR1 5'UTR-a-AS         | 5'-CAAGTAGAACTCCAGAGTGAG-3'   |
| ESR1 5'UTR-b-S          | 5'-GAAGTCTCTTCTCGAATGCT-3'    |
| ESR1 5'UTR-b-AS         | 5'-TCTCAAGTCCCGTATCTTCA-3'    |
| ESR1 5'UTR-c#1-S        | 5'-GAATGAACAAGACTCCTGAC-3'    |
| ESR1 5'UTR-c#1-AS       | 5'-TCTGGCGCAGGTAAGTTGTA-3'    |
| ESR1 5'UTR-c#2-S        | 5'-CTAGCACTTCATGTGATTCT-3'    |
| ESR1 5'UTR-c#2-AS       | 5'-CCATTGTACAGCACTGTTCT-3'    |
| ESR1 5'UTR-d-S          | 5'-TTTGAAGCACCCCTCTCTTCCT-3'  |
| ESR1 5'UTR-d-AS         | 5'-GTCCTTAGTACCTCGTTCCT-3'    |
| ESR1 5'UTR-e#1-S        | 5'-GCTCCCCAGAGAGAAATTAA-3'    |
| ESR1 5'UTR-e#1-AS       | 5'-GCCTATCACTACAGAAGACA-3'    |

|                         |                               |
|-------------------------|-------------------------------|
| ERBB2-mRNA-S            | 5'-CCTCACAGAGATCTTGAAAG-3'    |
| ERBB2-mRNA-AS           | 5'-AGAGCGGTTGGTGTCTATCA-3'    |
| ESR1 exon 2-S           | 5'-TCTGCCAAGGAGACTCGCTACT-3'  |
| ESR1 exon 2-AS          | 5'-CACAGGACCAGACTCCATAATGG-3' |
| ESR1 exon 5-S           | 5'-TTGACCCTCCATGATCAGGTC-3'   |
| ESR1 exon 5-AS          | 5'-ACGAGACCAATCATCAGGA-3'     |
| ESR1 exon 8-S           | 5'-CAACATCAGCAGTAAAGTCC-3'    |
| ESR1 exon 8-AS          | 5'-TACGGCAAGCTAGGCAATGG-3'    |
| ASXL2-S                 | 5'-CCTGAGCCTTGAAGATTCT-3'     |
| ASXL2-AS                | 5'-ACTGATAAGAGAGGCCTCTGA-3'   |
| Sirt1-mRNA-S            | 5'-AGCTCTAGTACTGGACTC-3'      |
| Sirt1-mRNA-AS           | 5'-ATGATTGGCACAGATCCTCG-3'    |
| GAPDH-mRNA-S            | 5'-ACACCCACTCCTCCACCTTT-3'    |
| GAPDH-mRNA-AS           | 5'-TAGCCAAATTCGTTGTCATACC-3'  |
|                         |                               |
| <b>ChIP-qPCR primer</b> | <b>Sequence</b>               |
| ESR1 5'UTR-c#3-S        | 5'-ACTTTGGAGAAGGACTGCCT-3'    |
| ESR1 5'UTR-c#3-AS       | 5'-TTCATTGCGAGGACTGACTC-3'    |
| ESR1 5'UTR-f-S          | 5'-TTCGTCCTGGGACTGCACTTG-3'   |
| ESR1 5'UTR-f-AS         | 5'-AAAAGAGCACAGCCCGAGGTTA-3'  |
|                         |                               |
| <b>PCR primer</b>       | <b>Sequence</b>               |
| u-Eleanor-c#4-S         | 5'-GACATCCTTGATGAAGGAGA-3'    |
| u-Eleanor-c#4-AS        | 5'-GCATGGCTAACGAGAGTAAC-3'    |
| ESR1 5'UTR-e#2-S        | 5'-AACCCCTTGCCCAGCAAATCA-3'   |
| ESR1 5'UTR-e#2-AS       | 5'-AGATCCACCACACAGCTGAT-3'    |
| ESR1-exon1-g-S          | 5'-ATCAGATCCAAGGGAACGAG-3'    |
| ESR1-exon1-g-AS         | 5'-TCCAGGTAGTAGGGCACCTG -3'   |
| APP-S                   | 5'-GCCAAGAAGTCTACCCTGAA-3'    |
| APP-AS                  | 5'-AGTTCTGGATGGTCACTGGTT-3'   |
|                         |                               |
| <b>3C primer</b>        | <b>Sequence</b>               |
| reference               | 5'-GTCATCATGTAGTCTGGGTCT-3'   |
| i                       | 5'-CGTTCTCCAAACTGATGACCA-3'   |
| ii                      | 5'-TTGGCTCAAGCCAAGTAGATG-3'   |

|                    |                               |
|--------------------|-------------------------------|
| iii                | 5'-GCATACCTAATCAGCTAATTCTG-3' |
| iv                 | 5'-ATGAGTCCTAGCCTATGCTC-3'    |
| v                  | 5'-GGAAACAAAGTCATTACCTC-3'    |
| vi                 | 5'-GTGCCAGGATATTTGAAAA-3'     |
| loading control-S  | 5'-TAACCTGCTCTGACTCGCCT-3'    |
| loading control-AS | 5'-CAGTCTTTCTGGCACTGTATTC-3'  |
|                    |                               |
| <b>siRNA</b>       | Target sequence               |
| u-Eleanor #1       | 5'-GGGAAGGAGGUAAAGUCA-3'      |
| u-Eleanor #2       | 5'-GCUUCUUGUCACCAGUUCG-3'     |
| Sirt1 #1           | 5'-CUUGUACGACGAAGACGAC-3'     |
| Sirt1 #2           | 5'-GCAACAGCAUCUUGCCUGA3'      |
| GL3                | 5'-CUUACGCUGAGUACUUCGA-3'     |

**Supplementary Table 4. *ESR1* FISH signals in breast cancer tissues**

|                                   | <i>ESR1</i> signal type |                  |                |                 | total sample number |
|-----------------------------------|-------------------------|------------------|----------------|-----------------|---------------------|
|                                   | - <sup>d</sup>          | -/+ <sup>e</sup> | + <sup>f</sup> | ++ <sup>g</sup> |                     |
| luminal type <sup>a</sup>         | 5 (9.3%)                | 5 (9.3%)         | 4 (7.4%)       | 40 (74%)        | 54                  |
| ERBB2 type <sup>b</sup>           | 48 (72.7%)              | 18 (27.3%)       | 0 (0%)         | 0 (0%)          | 66                  |
| triple negative type <sup>c</sup> | 15 (75%)                | 4 (20%)          | 1 (5%)         | 0 (0%)          | 20                  |
| total                             | 68                      | 27               | 5              | 40              | 140                 |

<sup>a</sup> Breast cancers containing HR (hormone receptor)+ ERBB2- type and HR+ ERBB2+ type, where HR+ indicates ER and/or PR (progesterone receptor) positive.

<sup>b</sup> Breast cancers of HR- ERBB2+

<sup>c</sup> Breast cancers of HR- ERBB2-

<sup>d</sup> no detectable signal

<sup>e</sup> faint signals

<sup>f</sup> median signals

<sup>g</sup> strong enlarged signals



### Supplementary Table 5. Protein coding potentials predicted by CPAT program

(<http://lilab.research.bcm.edu/cpat/>)

| Region in<br>Supplementay<br>Fig.3a | Chromosomal position<br>(RNA size)        | Open reading<br>frame size (bp) | Ficket<br>Score | Hexamer<br>Score | Coding<br>Probability | Coding Label |
|-------------------------------------|-------------------------------------------|---------------------------------|-----------------|------------------|-----------------------|--------------|
| (1)                                 | chr6:152,084,924-152,086,091<br>(1,168)   | 261                             | 0.7478          | -0.2616481       | 0.00880203            | no           |
| (1)                                 | chr6:152,083,595-152,086,194<br>(2,600)   | 261                             | 0.7478          | -0.2616481       | 0.00807495            | no           |
| (1)                                 | chr6:152,084,000-152,086,000<br>(2,001)   | 261                             | 0.7478          | -0.2616481       | 0.00837155            | no           |
| (2)                                 | chr6:152,084,000-152,129,000<br>(45,001)  | 441                             | 0.7534          | -0.0662936       | 0.0157989             | no           |
| (3)                                 | chr6:152,011,000-152,129,000<br>(118,001) | 477                             | 0.6815          | -0.2367289       | 7.29E-05              | no           |
| (4)                                 | chr6:152,129,000-152,131,000<br>(2,001)   | 819                             | 1.1702          | 0.3541562        | 0.99870944            | yes          |

**Supplementary Table 6. Mean  $\Delta$ CT values of qRT-PCR experiments in Fig. 2a, 2e, and 4b**

For Fig. 2a

| exon1 |         | a    |         | b    |         | c    |         | d    |         | e    |         | ERBB2 |         |
|-------|---------|------|---------|------|---------|------|---------|------|---------|------|---------|-------|---------|
| MCF7  | 3.49378 | MCF7 | 4.8871  | MCF7 | 4.71378 | MCF7 | 4.43755 | MCF7 | 4.36595 | MCF7 | 4.4381  | MCF7  | 9.34465 |
| LTED  | 2.01553 | LTED | 3.0597  | LTED | 2.99485 | LTED | 2.56123 | LTED | 2.61155 | LTED | 2.65818 | LTED  | 7.78683 |
| RES   | 5.18195 | RES  | 5.68048 | RES  | 5.91428 | RES  | 5.1647  | RES  | 5.31305 | RES  | 5.29723 | RES   | 9.86785 |

For Fig. 2e

| MCF7  |      | LTED  |      |
|-------|------|-------|------|
| ESR1  | 5.59 | ESR1  | 2.42 |
| ERBB2 | 7.83 | ERBB2 | 4.97 |

For Fig. 4b

| a    |         | b    |         | c#1  |         | c#2  |         | d    |         | e    |         |
|------|---------|------|---------|------|---------|------|---------|------|---------|------|---------|
| MCF7 | 15.0615 | MCF7 | 12.7664 | MCF7 | 11.6586 | MCF7 | 11.7532 | MCF7 | 13.8653 | MCF7 | 17.6394 |
| LTED | 13.9258 | LTED | 9.61377 | LTED | 9.6708  | LTED | 9.87387 | LTED | 11.7876 | LTED | 15.0048 |
| RES  | 14.4976 | RES  | 12.1984 | RES  | 12.2751 | RES  | 11.453  | RES  | 13.9229 | RES  | 16.4617 |
| ICI  | 12.8113 | ICI  | 10.8151 | ICI  | 9.98347 | ICI  | 9.96257 | ICI  | 12.5884 | ICI  | 14.5272 |
